# Supplementary material for: Hydrogenative ring-rearrangement of biomass derived 5-(hydroxymethyl)furfural to 3-(hydroxymethyl)cyclopentanol using combination catalyst systems of Pt/SiO2 and lanthanoid oxides
Source: Royal Society of Chemistry journal article supplement (doi:10.1039/c7cy00712d), 2017-01-01
Supplement: c7cy00712d1.pdf [file c7cy00712d1.pdf]

*Supplementary Information*

**Hydrogenative Ring-Rearrangement of Biomass Derived 5-(Hydroxymethyl)furfural to 3-(Hydroxymethyl)cyclopentanol Using Combination Catalyst Systems of Pt/SiO<sub>2</sub> and Lanthanoid Oxides**

J. Ohyama,<sup>a,b\*</sup> Y. Ohira<sup>a</sup> and A. Satsuma<sup>a,b\*</sup>

<sup>a</sup> *Department of Materials Chemistry, Graduate School of Engineering, Nagoya University, Nagoya 464-8603, Japan.*

<sup>b</sup> *Elements Strategy Initiative for Catalysts and Batteries (ESICB), Kyoto University.*

**Table S1.** Composition of diastereomers of 3-(hydroxymethyl)cyclopentanol (HCPO) for Table 1.

| Entry | Catalyst                                                         | (1R,3R) or (1S,3S) | (1R, 3S) or (1S, 3R) |
|-------|------------------------------------------------------------------|--------------------|----------------------|
| 1     | Pt/SiO <sub>2</sub> +Nd <sub>2</sub> O <sub>3</sub>              | 31                 | 57                   |
| 2     | Pt/SiO <sub>2</sub> +La <sub>2</sub> O <sub>3</sub>              | 28                 | 54                   |
| 3     | Pt/SiO <sub>2</sub> +CeO <sub>2</sub>                            | 26                 | 48                   |
| 4     | Pt/SiO <sub>2</sub> +Dy <sub>2</sub> O <sub>3</sub>              | 20                 | 36                   |
| 5     | Pt/SiO <sub>2</sub> +Yb <sub>2</sub> O <sub>3</sub>              | 27                 | 52                   |
| 6     | Pt/SiO <sub>2</sub> +Ta <sub>2</sub> O <sub>5</sub>              | 0                  | 4                    |
| 7     | Pt/SiO <sub>2</sub> +Al <sub>2</sub> O <sub>3</sub>              | 15                 | 36                   |
| 8     | Pt/SiO <sub>2</sub>                                              | 3                  | 6                    |
| 9     | Pt/SiO <sub>2</sub> +TiO <sub>2</sub>                            | 14                 | 29                   |
| 10    | Pt/SiO <sub>2</sub> +ZrO <sub>2</sub>                            | 4                  | 8                    |
| 11    | Pt/SiO <sub>2</sub> +Nb <sub>2</sub> O <sub>5</sub>              | 12                 | 27                   |
| 12    | Pt/SiO <sub>2</sub> +SAH                                         | 10                 | 21                   |
| 13    | Pt/SiO <sub>2</sub> +HT                                          | 6                  | 14                   |
| 14    | Pt/SiO <sub>2</sub> +MgO                                         | 2                  | 5                    |
| 15    | Pt/La <sub>2</sub> O <sub>3</sub>                                | 0                  | 0                    |
| 16    | Pt/SiO <sub>2</sub> +H <sub>3</sub> PO <sub>4</sub> <sup>d</sup> | 0                  | 1                    |

**Table S2.** Composition of diastereomers of 3-(hydroxymethyl)cyclopentanol (HCPO) for Table 2.

| Entry | Catalyst                                            | (1R,3R) or (1S,3S) | (1R, 3S) or (1S, 3R) |
|-------|-----------------------------------------------------|--------------------|----------------------|
| 1     | Pt/SiO <sub>2</sub>                                 | 10                 | 26                   |
| 2     | Pt/SiO <sub>2</sub> +Ta <sub>2</sub> O <sub>5</sub> | 5                  | 11                   |
| 3     | Pt/SiO <sub>2</sub> +Al <sub>2</sub> O <sub>3</sub> | 18                 | 34                   |
| 4     | Pt/SiO <sub>2</sub> +Nb <sub>2</sub> O <sub>5</sub> | 23                 | 42                   |
| 5     | Pt/SiO <sub>2</sub> +SAH                            | 13                 | 27                   |
| 6     | Pt/SiO <sub>2</sub> +MgO                            | 5                  | 13                   |

**(1R,3R) or (1S,3S)-3-(hydroxymethyl)cyclopentanol**

$^1\text{H}$  NMR ( $\text{CD}_3\text{OD}/\text{CDCl}_3$  2:1, 500MHz)

$\delta$  in ppm: 4.23 (m, 1H), 2.26 (m, 1H), 1.83 (m, 2H), 1.69 (m, 1H), 1.53 (m, 1H), 1.41 (m, 1H), 1.26 (m, 1H).

GC-MS:  $m/z = 116$   $[\text{M}]^+$

$^1\text{H}$  NMR chart of (1R,3R) or (1S,3S)-3-(hydroxymethyl)cyclopentanol

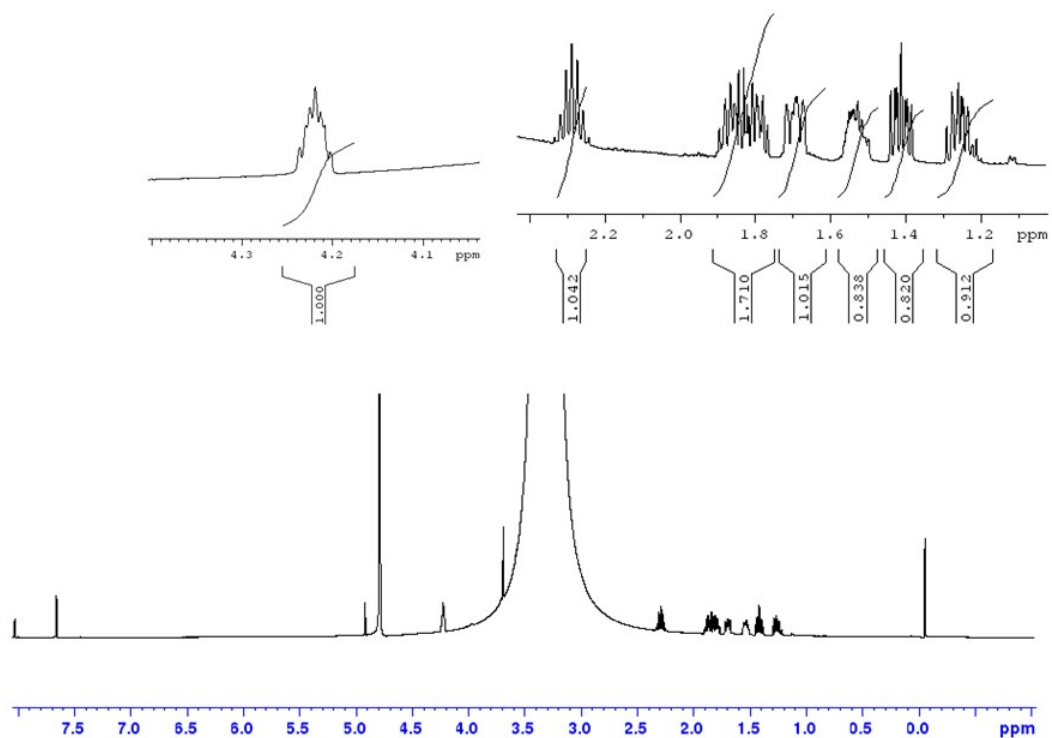

**(1R,3S) or (1S,3R)-3-(hydroxymethyl)cyclopentanol**

$^1\text{H}$  NMR ( $\text{CD}_3\text{OD}$ , 500MHz)

$\delta$  in ppm: 4.29 (m, 1H), 3.61 (m, 1H), 2.71 (br, 2H), 2.29 (m, 1H), 2.02 (m, 1H), 1.80 (m, 2H), 1.68 (m, 3H), 1.50 (m, 1H).

GC-MS:  $m/z = 116$   $[\text{M}]^+$

$^1\text{H}$  NMR chart of (1R,3S) or (1S,3R)-3-(hydroxymethyl)cyclopentanol

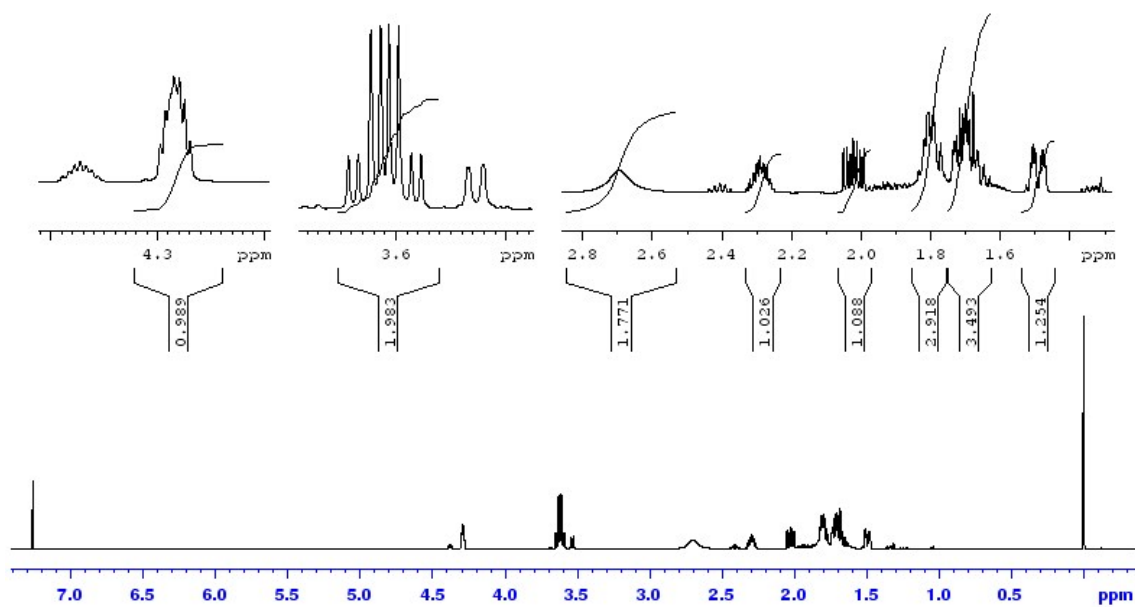

**Table S3.** Peak wavenumber of FT-IR band due to  $\nu_{8a}$  mode of pyridine adsorbed on MOx.

| Metal oxide                    | Wavenumber (cm <sup>-1</sup> ) |
|--------------------------------|--------------------------------|
| MgO                            | 1588                           |
| La <sub>2</sub> O <sub>3</sub> | 1592                           |
| Nd <sub>2</sub> O <sub>3</sub> | 1597                           |
| CeO <sub>2</sub>               | 1598                           |
| Dy <sub>2</sub> O <sub>3</sub> | 1602                           |
| HT                             | 1602                           |
| Yb <sub>2</sub> O <sub>3</sub> | 1603                           |
| ZrO <sub>2</sub>               | 1604                           |
| TiO <sub>2</sub>               | 1604                           |
| Nb <sub>2</sub> O <sub>5</sub> | 1604                           |
| Ta <sub>2</sub> O <sub>5</sub> | 1607                           |
| Al <sub>2</sub> O <sub>3</sub> | 1614                           |
| SAH                            | 1619                           |

The HMF hydrogenation was conducted using Pt/SiO<sub>2</sub> + 50 mg of Nd<sub>2</sub>O<sub>3</sub> (five times amount of the catalyst in Table 1). As presented in Table 4 (entry 1), 90% yield of HCPO was obtained under the same reaction conditions as Table 1. In other words, the amount of Nd<sub>2</sub>O<sub>3</sub> did not affect the yield of the ring-rearranged product. The result suggests that the Lewis acid amount of Nd<sub>2</sub>O<sub>3</sub> has little effect on the ring-rearrangement.

The ring-rearrangement of BHF to HHCPEN was conducted using Nd<sub>2</sub>O<sub>3</sub> as shown in Table S4 (entry 2 and 3). The ring-rearrangement reaction was improved by Nd<sub>2</sub>O<sub>3</sub> in comparison with the reaction without solid catalysts, although the yield of HHCPEN was low. The low yield of HHCPEN might be due to the undesired degradation of BHF, because BHF is relatively easily polymerized.

**Table S4.** Product yields for HMF hydrogenation on 10 mg Pt/SiO<sub>2</sub> + 50 mg Nd<sub>2</sub>O<sub>3</sub> (entry 1), and those for BHF hydrogenation on 10 mg Nd<sub>2</sub>O<sub>3</sub> (entry 2) and without catalyst (entry 3).

| Entry | Catalyst                                                            | Product yield (%) <sup>b</sup> |      |        |     |       |     |     |          |
|-------|---------------------------------------------------------------------|--------------------------------|------|--------|-----|-------|-----|-----|----------|
|       |                                                                     | HCPO <sup>b</sup>              | HCPN | HHCPEN | BHF | BHTHF | HHD | HDN | 1,2,6-HT |
| 1     | 10 mg Pt/SiO <sub>2</sub><br>+ 50 mg Nd <sub>2</sub> O <sub>3</sub> | 90                             | 0    | 0      | 0   | 0     | 0   | 0   | 0        |
| 2     | 10 mg Nd <sub>2</sub> O <sub>3</sub>                                | 0                              | 0    | 35     | 0   | 0     | 0   | 0   | 0        |
| 3     | -                                                                   | 0                              | 0    | 28     | 0   | 0     | 0   | 0   | 0        |

<sup>a</sup> Reaction conditions: 0.067 M HMF or BHF aq. 3 mL; H<sub>2</sub> 3 MPa, 140°C, 30 h. <sup>b</sup> Reaction conditions: 0.067 M BHF aq. 3 mL; H<sub>2</sub> 3 MPa, 140°C, 6 h.
